1 **Title Page**

2 **Transcutaneous vagus nerve stimulation in humans induces pupil dilation and**  
3 **attenuates alpha oscillations**

4 Abbreviated title:

5 tVNS induces pupil dilation & attenuates alpha oscillations

6 Author names and affiliations, including postal codes:

7 Omer Sharon<sup>1</sup>, Firas Fahoum<sup>2,3</sup>, Yuval Nir<sup>1,4</sup>

8 1. Department of Physiology and Pharmacology, Sackler Faculty of Medicine, Tel Aviv

9 University, Israel, Tel Aviv 69978, Israel

10 2. Sackler Faculty of Medicine, Tel-Aviv University, Tel Aviv 69978, Israel

11 3. EEG and Epilepsy Unit, Department of Neurology, Tel Aviv Sourasky Medical Center, Tel

12 Aviv, Israel.

13 4. Sagol School of Neuroscience, Sagol School of Neuroscience, Tel Aviv 69978, Israel

14 Corresponding author email address:

15 [yuvalnir.tau@gmail.com](mailto:yuvalnir.tau@gmail.com)

16 4 figures

17 240 word in abstract

18 669 words in introduction

19 1612 word in discussion

20

21 Conflict of interest

22 **none**

23

## 1 **Abstract**

2 Vagus nerve stimulation (VNS) is widely used to treat drug-resistant epilepsy and  
3 depression. While the precise mechanisms mediating its long-term therapeutic effects  
4 are not fully resolved, they likely involve Locus Coeruleus (LC) stimulation via the  
5 nucleus of the solitary tract (NTS) that receives afferent vagal inputs. In rats, VNS  
6 elevates LC firing and forebrain noradrenaline (NE) levels, whereas LC lesions  
7 suppress VNS therapeutic efficacy. Non-invasive transcutaneous VNS (tVNS) employs  
8 electrical stimulation targeting the auricular branch of the vagus nerve at the Cymba  
9 Conchae of the ear, but it remains unclear to what extent tVNS mimics VNS. Here, we  
10 investigated the short-term effects of tVNS in healthy human male volunteers (n=24)  
11 using high-density EEG and pupillometry during visual fixation at rest, comparing short  
12 (3.4s) trials of tVNS to sham electrical stimulation at the earlobe (far from the vagus  
13 nerve branch) to control for somatosensory stimulation. Although tVNS and sham  
14 stimulation did not differ in subjective intensity ratings, tVNS led to robust pupil  
15 dilation (peaking 4-5s after trial onset) that was significantly higher than following  
16 sham stimulation. We further quantified how tVNS modulates idle occipital alpha (8-  
17 13Hz) activity, identified in each participant using parallel factor analysis. We found  
18 that tVNS attenuates alpha oscillations to a greater extent than does sham stimulation.  
19 Thus, tVNS reliably induces pupillary and EEG markers of arousal beyond the effects  
20 of somatosensory stimulation, supporting the hypothesis that it elevates noradrenaline  
21 and acetylcholine signaling and mimics invasive VNS.

22

## 1 **Significance statement**

2 Current non-invasive brain stimulation techniques are mostly confined to modulating cortical  
3 activity, as is typically the case with transcranial magnetic or transcranial direct/alternating-  
4 current electrical stimulation. tVNS has been proposed to stimulate brainstem arousal nuclei,  
5 but previous studies yielded inconsistent results. Here we show that short (3.4s) tVNS pulses  
6 in naïve healthy participants induce transient pupil dilation and attenuation of occipital alpha  
7 oscillations. These markers of brain arousal are in line with the established effects of invasive  
8 VNS on LC-NE signaling, and support the notion that tVNS mimics VNS. Therefore, tVNS  
9 can be used as a tool for studying how endogenous neuromodulation (NE/ACh) signaling  
10 affects human cognition including perception, attention, memory, and decision-making, as  
11 well as for developing novel clinical applications.

## 1 **Introduction**

2 Vagus nerve stimulation (VNS) has been successfully used to reduce epileptic seizures in  
3 patients with drug-resistant epilepsy since 1988 (Krahl and Clark, 2012) and is clinically  
4 effective for many patients treated with invasive VNS (Boon et al., 2018; Kwon et al., 2018).  
5 In addition, it is applied as a treatment for drug resistant major depression (e.g Nemeroff et al.,  
6 2006).

7 VNS modulates vagal afferent inputs to the brainstem Nucleus Tractus Solitarius that then  
8 activates the LC-NE system. Indeed, in rats VNS increases LC neuronal discharges (Takigawa  
9 and Mogenson, 1977; Groves et al., 2005; Hulsey et al., 2017) and elevates NE levels in  
10 hippocampus and cortex (Dorr and Debonnel, 2006; Roosevelt et al., 2006). The effects of VNS  
11 on LC-NE are considered key to reducing seizures, since a strong positive correlation is found  
12 between the noradrenergic and anticonvulsive effects of VNS (Raedt et al., 2011), and chemical  
13 lesions of the LC eliminate these anticonvulsive effects (Krahl et al., 1998). VNS also  
14 modulates activity in other subcortical neuromodulatory systems such as the serotonergic dorsal  
15 raphe and cholinergic basal forebrain, serotonergic modulations are mostly secondary, i.e. occur  
16 later and mediated through the LC-NE system (Dorr and Debonnel, 2006; Manta et al., 2009).  
17 Recent evidence (Mridha et al., 2019) show that VNS induce substantial cholinergic modulations  
18 in the basal forebrain, however it is still to be discovered whether these are mediated by the  
19 LC.

20 In human patients, invasive VNS induces markers of brain arousal that are consistent with LC-  
21 NE activity such as pupil dilation (Desbeaumes Jodoin et al., 2015) that is tightly linked with  
22 LC-NE activity (Joshi et al., 2016; Reimer et al., 2016; Gelbard-Sagiv et al., 2018; Hayat et al.,  
23 2020). VNS may also lead to EEG desynchronization, but effects are subtler than pupil dilation,  
24 at least with the clinical parameters that typically employ long (30-60s) stimulation epochs.  
25 Accordingly, early studies with <10 patients each, did not find VNS effects on spontaneous  
26 intracranial EEG (Hammond et al., 1992) or scalp EEG (Salinsky and Burchiel, 1993), whereas

1 a recent study with 19 participants that separated VNS ‘responders’ from ‘non-responders’  
2 observed EEG desynchronization in the alpha and delta bands (Bodin et al., 2015).

3 Non-invasive transcutaneous vagal nerve stimulation (tVNS) applies electrical current at a high  
4 frequency (typically 25Hz) through the left ear, targeting the auricular branch of the vagus nerve  
5 at the Cymba Conchae (Figure1) (for anatomic evidence see Van Bockstaele et al., 1999;  
6 Bermejo et al., 2017). tVNS has been shown to mimic the anticonvulsive and antidepressant  
7 effects of invasive VNS (Stefan et al., 2012; He et al., 2013; Hein et al., 2013; Bauer et al.,  
8 2016; Rong et al., 2016; Trevizol et al., 2016) and proved to be safe and tolerable (Redgrave et  
9 al., 2018). Beyond its clinical efficacy, there is growing interest in using tVNS in healthy  
10 individuals for basic neuroscience research (Van Leusden et al., 2015), but previous studies are  
11 inconsistent in determining to what extent tVNS mimics invasive VNS with respect to the  
12 effects on EEG or pupil dilation that could suggest LC-NE involvement (Ventura-Bort et al.,  
13 2018; Warren et al., 2018; Keute et al., 2019). We suspected that such inconsistencies stem  
14 from employing long (e.g. 30sec) stimulation epochs as used clinically, and due to the indirect  
15 focus on the P300 component where LC-NE activity is assumed to play a key role.

16 Here, we set out to test if short-term tVNS induces EEG and pupillary markers of arousal, as is  
17 the case for VNS-induced activation. We used short (3.4s) stimulation pulses during task-free  
18 rest conditions in healthy naïve volunteers (to avoid long-term changes associated with  
19 therapeutic effects (Follesa et al., 2007; Manta et al., 2013)). We hypothesized that if indeed  
20 tVNS increases LC activity, it should lead to pupil dilation as observed across multiple species  
21 (Joshi et al., 2016; Reimer et al., 2016; Hayat et al., 2020). In addition, we hypothesized that  
22 tVNS will attenuate alpha oscillations that are anti-correlated with arousal during rest (Torsvall  
23 and Akerstedt, 1987a; Drapeau and Carrier, 2004a; Amzica and Lopes da Silva, 2017), and are  
24 attenuated by invasive VNS (Bodin et al., 2015). In line with these predictions, we found that  
25 tVNS induces pupil dilation and alpha desynchronization above and beyond the effects of sham  
26 (somatosensory) stimulation.

## 1 **Materials and methods**

### 2 **Participants**

3 High-density (256-channel) EEG and pupillometry recording were performed in 25 healthy  
4 young male adults (mean age:  $28.08 \pm 5.84$  years, 2 left-handed). Written informed consent was  
5 obtained from each participant. The study was approved by the Medical Institutional Review  
6 Board (IRB) at the Tel Aviv Sourasky Medical Center. Female subjects of child bearing age  
7 were not included per guidelines of the approved IRB. Participants reported to be healthy,  
8 without history of neuropsychiatric disorders, and indicated their dominant eye for  
9 pupillometry. One participant was excluded due to excessive blinking, after which 24  
10 participants remained (mean age:  $28.3 \pm 1.2$ ). Data from additional three subjects were excluded  
11 from EEG analysis due to lack of alpha activity, after which 21 subjects remained for EEG  
12 analysis (mean age  $28.01 \pm 1.3$ ).

### 13 **Experimental design**

14 **Main experiment.** After EEG setup (see below), participants performed a short ‘method of  
15 limits’ procedure to select tVNS/sham stimulation intensities while sitting. This procedure  
16 systematically finds the maximal comfortable stimulation levels for each individual, as in  
17 (Kraus et al., 2013; Yakunina et al., 2017; Ventura-Bort et al., 2018). We applied 5s-long  
18 stimulation trials, starting at 0.1mA, and increasing in each trial by 0.2mA. After each trial,  
19 participants rated the subjective intensity on a scale of 0-9 ([0] = no sensation; [3] = light  
20 tingling; [6] = strong tingling; [9] = painful) and we kept increasing the current until reaching  
21 a level rated as [9] or a maximal level of 5mA. This procedure was carried out twice for each  
22 stimulation location (real tVNS at cymba cochlea vs. sham stimulation at ear lobe), and the  
23 selected currents were the average currents corresponding to a subjective rating of [8] (just  
24 below painful), for each stimulation location separately. Thus, tVNS intensity was adjusted for  
25 each subject and location separately to be above the detection threshold and below the pain  
26 threshold, as in clinical settings (Ellrich, 2011). Participants were then instructed to position

1 their heads in a chin-rest apparatus for adjusting and calibrating the eye-tracker (see below).  
2 Then, participants were instructed to fixate on a white cross on a background of a gray computer  
3 screen (HP model 2311x, positioned 80cm from participants' eyes) throughout experimental  
4 "blocks" lasting 5 minutes, each including 11 trials of 3.4s stimulation epochs (in each trial,  
5 tVNS intensity ramped up gradually up to the level defined above), separated by inter-stimulus-  
6 intervals of 26s ( $\pm 1$ s jitter). We performed two blocks of either tVNS or sham, and then  
7 switched to position the stimulating electrode in the alternate location (order counterbalanced),  
8 reaching a total of eight blocks altogether per session (Figure 1C). Before changing the  
9 electrode location, participants answered questions regarding their subjective experience of  
10 stimulation (Table 1). Participants were free to rest between the blocks ad lib. We refer to these  
11 rest periods as "breaks", and data acquired during these times were used to characterize alpha  
12 activity in each individual in a manner unbiased with respect to experimental conditions (see  
13 below).

14 **Pilot experiment.** A similar experiment using the same device with a separate group of 29 male  
15 participants (mean age:  $26.82 \pm 1.1$  years, 4 left-handed) used the default clinical stimulation  
16 mode (30s on, 30s off) during fixation at rest while recording high-density EEG (n=15) and  
17 pupillometry (n=29).

## 18 **Transcutaneous Vagus Nerve Stimulation (tVNS)**

19 tVNS was delivered using NEMOS®, (Cerbomed, Germany, now tVNS technologies; Figure  
20 1B). In the tVNS condition, the electrodes were placed at the left Cymba Conchae, which is  
21 heavily innervated by the auricular branch of the vagus nerve (Peuker and Filler, 2002; Safi et  
22 al., 2016; Badran et al., 2018) (Figure 1A). In the sham condition, the electrodes were placed  
23 at the left earlobe (Figure 1A), which is not expected to induce brainstem or cortical activation  
24 (Kraus et al., 2007; Sellaro et al., 2015; Steenbergen et al., 2015). Pulses (200-300 $\mu$ s width)  
25 were delivered at a rate of 25Hz (duty cycle of ~7% ON time, see Figure 1) for 3.4s that included  
26 a ramping up of intensity (as set by the device) to a level experienced as just-below painful,

1 adjusted for each participant and condition separately ('method of limits' procedure above), as  
2 often set clinically in patients (Vonck et al., 2014). To achieve 3.4s stimulation trials, we  
3 controlled the NEMOS stimulation device using linear actuators (Actounix, Canada) that  
4 pressed the ON/OFF button automatically according to programmable times. These actuators  
5 were controlled by Arduino mega (Arduino, Italy) directed by Psychopy python package  
6 (Peirce, 2007). Two additional measures verified good electrode contact throughout, and  
7 consistent effectiveness of stimulation: (i) the NEMOS device stops stimulation automatically  
8 whenever good physical contact with the participant's skin is disrupted, and (ii) the  
9 experimenter verified in each participant the presence of a visually-evident 25Hz stimulation  
10 artifact in EEG electrodes close to the left ear.

11

## 12 **Figure 1: Experimental design**

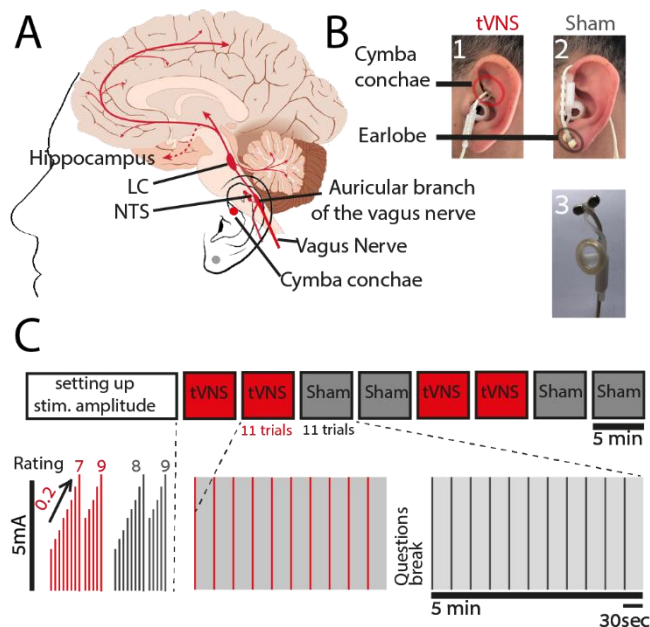

13

14 **Legend:** (A) Schematic illustration of the rationale of tVNS (B) Stimulation electrode  
15 placement – (1) location of tVNS effective location on the Cymba conchae of the left ear (2)  
16 location of the sham ineffective location (3) Photo of the commercial stimulation electrode. (C)  
17 Experimental design, each experiment started with a 'method of limits' procedure in order to  
18 adjust stimulation current according to individual subjective pain report (Rating) and increase  
19 in 0,2 mA every step until a current matched to a rating of 8 was selected. Then there 8 blocks  
20 each of 5min including 11 stimulation trials of 3.4s and stimulation interval of d of 25-27s.



## 1 **Pupillometry**

2 **Data acquisition.** Eye movements/gaze and pupil size were recorded monocularly from the  
3 dominant eye using infrared video-oculographic system with a chin-rest (Eyelink 1000 Plus,  
4 SR Research). Gaze and pupil data were sampled at 500Hz, positions were converted into  
5 degrees of visual angle based on a 9-point calibration performed at the beginning of the  
6 experiment (on mid-gray background). The experiment was carried out in a room with constant  
7 ambient light.

## 8 **Data analysis.**

9 Pupil data were low-passed using a 10Hz 4th order Butterworth filter with zero phase shift and  
10 periods of blinks were detected using the manufacturer's standard algorithms with default  
11 settings. The remaining data analyses were performed using custom-made Matlab scripts (The  
12 MathWorks). Blinks were removed by linear interpolation of values measured 100ms before  
13 and after each identified blink (de Gee et al., 2014). Segmentation of peri-trial data was  
14 performed by extracting pupil data [-10s +13.4s] around each stimulation trial. Trials with less  
15 than 50% of interpolated data points were excluded (van Steenbergen and Band, 2013). After  
16 excluding one participant that had no trials remaining, the process yielded an average of  
17  $42.12 \pm 1.79$  trials (out of 45, range 42-45) in the tVNS condition and  $42.16 \pm 1.79$  in the sham  
18 condition. We used these to calculate percent change values relative to baseline ( $x$ -  
19  $\text{baseline}/\text{baseline} * 100$ ) value in the 10s prior to stimulation: to receive a percent change time-  
20 course that allow averaging across subjects with different pupil size and avoiding arbitrary units  
21 (For example see Reimer et al., 2016; Liu et al., 2017). There was no significant difference in  
22 baseline values between conditions in arbitrary units, though in both conditions, the smaller the  
23 pupil is in a specific trial there is more chances to see pupil dilation (more trials show it,  $R =$   
24  $0.27$ ,  $p < 10^{-20}$ , see discussion).

25 The resulting pupil time-courses were the mean value across trials for each participant and  
26 condition separately, as depicted in Figure 2A (single subject traces were band-pass filtered

1 again between 0.01-10Hz for presentation in Figure 2C). In order to present the individual  
2 subject data, we reduced the pupil data for each participant and condition to a scalar value  
3 (Figure 2B) by averaging the time-course across trials in the interval between the two points of  
4 half maximum (FDHM, 3.2-10.4s) following stimulation onset (see dashed bar in Figure 2A).  
5 Gaze data and blink rate were also inspected and compared between conditions. Gaze was  
6 extracted, interpolated and averaged using the same procedure described above and data points  
7 marked as blinks were summed across participants to produce a blink rate time-locked to  
8 stimulation onset.

## 9 EEG

10 **Data acquisition.** High-density EEG was recorded continuously using a 256-channel hydrocel  
11 geodesic sensor net (Electrical Geodesics, Inc. [EGI], Eugene OR, USA). Each carbon-fiber  
12 electrode consists of a silver chloride carbon fiber pellet, a lead wire, a gold-plated pin, and was  
13 injected with conductive gel (Electro-Cap International). Signals were referenced to Cz,  
14 amplified via an AC-coupled high-input impedance amplifier with antialiasing analog filter  
15 (NetAmps 300, EGI) and digitized at 1000 Hz. Electrode impedance in all sensors was verified  
16 to be  $<50\text{ k}\Omega$  before starting the recording.

17 **EEG data analysis.** EEG preprocessing was performed in MATLAB (The MathWorks) using  
18 custom-written code as well as the FieldTrip toolbox (Oostenveld et al., 2011). First, we used  
19 a subsample of 192 electrodes placed directly on the skull (avoiding cheek electrodes with  
20 higher muscle artifacts). Continuous data from these electrodes were segmented to 33s epochs,  
21 [-15s +18s] around each stimulation onset. First, in order to allow effective visual inspection,  
22 data epochs were linearly de-trended, notch-filtered (at 50Hz), and high-pass ( $>0.1\text{Hz}$ ) filtered  
23 using a 2nd order Butterworth filter to remove DC shifts. We then visually confirmed that all  
24 sham and tVNS trials show 25Hz stimulation artifact around the left ear. Trials without the  
25 artifact were excluded. (on average,  $14.75\% \pm 3.08$  of trials were excluded) To focus on alpha  
26 oscillations, data were further band-passed filtered between 5-15Hz using a 3rd-order two-pass

1 Butterworth filter as in previous studies applying parallel factor analysis (Barzegaran et al.,  
2 2017) as well as an additional notch filter in 25Hz (stimulation frequency) and its harmonics  
3 up until 475Hz to remove any residual artifact stemming from stimulation that were not  
4 removed by previous filters. Then, we removed the minimal number of channels or trials whose  
5 data crossed an absolute amplitude threshold of  $100\mu\text{V}$  in an automatic iterative process – that  
6 is, each 3s epoch in each channel had a boolean value  $[\max(\text{abs}(x)) > 100?]$  – and then in each  
7 iteration a channel or a trial was excluded such that a minimal number of channel  $\times$  trial 3s data  
8 epochs are discarded (code is available at:  
9 [https://github.com/sharomer/eeg\\_2d\\_minimal\\_rejection](https://github.com/sharomer/eeg_2d_minimal_rejection)). This process removed large  
10 movement artifacts, but not all blink artifacts, which were separated later using the parallel  
11 factor analysis.

12 This resulted in identifying an average of  $18.76 \pm 2.86\%$  of bad channels per participant (out of  
13 192, data were interpolated using a linear distance weighted interpolation), and  $22 \pm 3.42\%$  bad  
14 trials per participant (discarded from subsequent analysis). Only then, trials were divided to  
15 tVNS or sham trials to avoid any bias in preprocessing. The average number of valid trials in  
16 the tVNS condition was  $35.61 \pm 1.09$  and in the Sham condition  $35.61 \pm 1.09$  (out of 44, not  
17 significantly different). Next, data of each trial were transformed to the time-frequency domain  
18 using the Fast Fourier Transform (FFT) after multiplying by a moving hamming window of 3s,  
19 yielding a frequency resolution of 0.33 Hz and temporal resolution of 0.33s.

20 **Parallel factor (PARAFAC) decomposition.** We first extracted data from “break” periods (in  
21 between stimulation blocks) to identify each participant’s alpha topography and frequency in  
22 an unbiased manner with respect to study objectives. These data were segmented to 5s epochs  
23 with 1s overlap with its preceding epoch and 1s with the following epoch, band-passed filtered  
24 (as for stimulation data, above) and reduced into 3s trials (discarding the overlap) to avoid  
25 filtering artifacts at edges. Then, data epochs were cleaned as described for stimulation data,  
26 using the same procedure described above (resulting in  $117.84 \pm 7.15$  trials on average per  
27 subject, with  $175.28 \pm 2.71$  clean channels on average). These 3s time-frequency epochs were

1 used to identify each participant's alpha topography and precise frequency range using the  
2 parallel factor analysis as implemented in the N-way toolbox (Andersson and Bro, 2000), as  
3 presented in Figure 3. The type of constraint for each dimension was set to non-negativity. The  
4 proper number of components was determined by using the Core Consistency Diagnostic  
5 (CCD) in which number of components is highest when the minimal value of CCD was 55%  
6 and  $90.60 \pm 3.18\%$  on average (Bro and Kiers, 2003).

7 Next, in order to assess the changes in alpha oscillations during stimulation, the individual  
8 weights for alpha component topography and frequency (Figure 4A) were derived from the  
9 break data, and multiplied by the spectrum of all channels such that a single channel  
10 representing the weighted activity was achieved. We then subtracted the mean baseline activity  
11 in [-1:0]s relative to stimulation onset for each subject, for each trial, and calculated the mean  
12 activity across subjects (N=21) to receive the results depicted in Figure 4C.

13 To assess more carefully the brain activity following stimulation beyond the a-priori electrode-  
14 and frequency-band of interest, we (i) rigidly set the alpha topography (to investigate time  
15 frequency changes in the entire spectrogram). To this end, we used the topography of interest  
16 derived from the PARAFAC decomposition of the break data (Figure 4A, lower panel), ignored  
17 the frequency of interest, plotted the entire spectrogram in 5-15Hz in %change relative to the  
18 same baseline ([-1:0]s relative to stimulation onset, Figure 4B), and used cluster permutation  
19 test (see below). We also confirmed the difference using post-hoc direct comparison using  
20 Wilcoxon sign rank tests (Results). Alternatively, we (ii) rigidly set the frequency-band of  
21 interest (to investigate changes in all electrodes). To this end, we used the frequency of interest  
22 derived from the PARAFAC decomposition of the break data (Figure 4A upper panel) and  
23 ignored the topography of interest, and plotted the entire topographical changes in voltage  
24 around times of stimulation, while subtracting the activity [-1:0s] prior to stimulation (Figure  
25 4D).

## 1 **Statistical Analyses**

2 Unless stated otherwise all statistical test were carried using a Wilcoxon sign rank test  
3 (Wilcoxon, 1945), including the significance of the pupil time-course that was corrected to  
4 multiple comparison using FDR correction (Benjamini and Yekutieli, 2011). The significance  
5 for alpha attenuation in the EEG spectrogram was assessed using a cluster permutation test with  
6 the Monte Carlo method and a dependent samples T-statistic with 10,000 permutations as  
7 implemented in the fieldtrip toolbox (Oostenveld et al., 2011). An alpha of 0.05 was considered  
8 significant after FDR correction for clusters (Benjamini and Yekutieli, 2011). In Figure 4, we  
9 plotted alpha attenuation at the individual subject level, so the reader could assess effect size  
10 across subjects; these per-subject values were tested also using Wilcoxon sign rank test (Figure  
11 4C). Data are expressed as mean  $\pm$  standard error of the mean throughout, or as median  $\pm$   
12 bootstrapped confidence intervals (not necessarily symmetrical, explicitly indicated where  
13 relevant)

## 1 **Results**

2 To investigate the short-term effects of tVNS in naïve humans, we compared pupil dynamics  
3 and EEG alpha oscillations in healthy young male volunteers (n=24) induced by multiple trials  
4 of short (3.4s) electrical stimulation at the Cymba Conche (tVNS) or at the earlobe (sham)  
5 (Figure 1). Stimulation was applied at a frequency of 25Hz with intensity ramping up during  
6 the trial up to a maximal value selected per participant and location separately (Methods).

7 First, we verified that sham and tVNS did not differ subjective averseness. The average currents  
8 applied were  $2.20 \pm 0.24$  mA in tVNS condition and a stronger  $2.79 \pm 0.27$  mA current in the sham  
9 condition ( $p=0.0125$ , ). Importantly, there was no significant difference between tVNS and  
10 sham in any subjective reports such as pain or irritation (Table 1,  $P>0.05$  for all comparisons  
11 after FDR correction). Therefore, earlobe stimulation provides a good somatosensory control  
12 to distill the changes related specifically to tVNS.

13 **Table 1: Subjective ratings of tVNS/sham stimulation**

|                                       | tVNS            | Sham            |
|---------------------------------------|-----------------|-----------------|
| I feel headache                       | $1.82 \pm 0.20$ | $1.89 \pm 0.22$ |
| I feel nausea                         | $1.67 \pm 0.19$ | $1.63 \pm 0.19$ |
| I feel dizziness                      | $1.82 \pm 0.22$ | $1.97 \pm 0.25$ |
| I feel neck pain                      | $1.87 \pm 0.16$ | $1.97 \pm 0.19$ |
| I feel muscle contraction in the neck | $2.10 \pm 0.20$ | $2.00 \pm 0.21$ |
| I feel stinging under the electrode   | $2.22 \pm 0.22$ | $2.18 \pm 0.23$ |
| I feel skin irritation in the ear     | $2.17 \pm 0.28$ | $2.15 \pm 0.27$ |
| I feel fluctuation in concentration   | $4.02 \pm 0.39$ | $3.73 \pm 0.36$ |
| I feel unpleasant feeling             | $2.52 \pm 0.29$ | $2.71 \pm 0.31$ |
| I am in good mood                     | $4.82 \pm 0.32$ | $5.23 \pm 0.27$ |
| I am alert                            | $4.07 \pm 0.32$ | $4.15 \pm 0.31$ |

## 14 **Transcutaneous vagus nerve stimulation induces pupil dilation**

15 tVNS led to robust pupil dilation that increased gradually (in line with the ramping up of the  
16 stimulation intensity), reaching half maximum at 2.53s after stimulation onset, peaking at 4.25s

1 after stimulation onset, decreasing back to half maximum at 8.17s and returning to baseline  
2 levels 9s after stimulation. During peak pupil dilation, pupil area (in pixels) was  $4.05 \pm 0.92\%$   
3 above baseline (Figure 2A).

4 By contrast, sham stimulation only led to modest  $1.67\% \pm 0.63\%$  pupil dilation, peaking around  
5 the same time, and this dilation level was significantly weaker than following tVNS ( $p < 0.05$   
6 between 2.88-5.96s via repeated Wilcoxon sign rank test sum across all time points, and FDR  
7 correction for multiple comparisons). These results were largely consistent across individual  
8 subjects (Figure 3B) and evident in most (21 out of 24) participants (Figure 2C).

9 We found no significant difference between conditions when comparing blink rate or gaze  
10 position ( $p > 0.6$  for all comparison, using the same statistical procedure). In addition, these  
11 results remain significant and robust across single subjects when avoiding blink interpolation  
12 and discarding blink data. In order to make sure this effect were not mediated by the objective  
13 current difference we calculated correlation between differences in pupil dilation between tVNS  
14 and Sham and the difference in current and found no correlation ( $R = -0.12$ ,  $p = 0.56$ , Spearman  
15 correlation).

16 In a pilot experiment employing 30s ON / 30s OFF 'clinical-like' stimulation we only observed  
17 a modest trend for greater pupil dilation for tVNS than sham stimulation ( $p = 0.053$ ,  $n = 23$ ), and  
18 there was no significant difference in pupil size between ON and OFF periods. Thus, short  
19 tVNS pulses lead to robust pupil dilation that is significantly greater than following sham  
20 stimulation, indicating that it promotes arousal above and beyond somatosensory stimulation at  
21 the ear.

1 **Figure 2: tVNS leads to greater pupil dilation than sham stimulation**

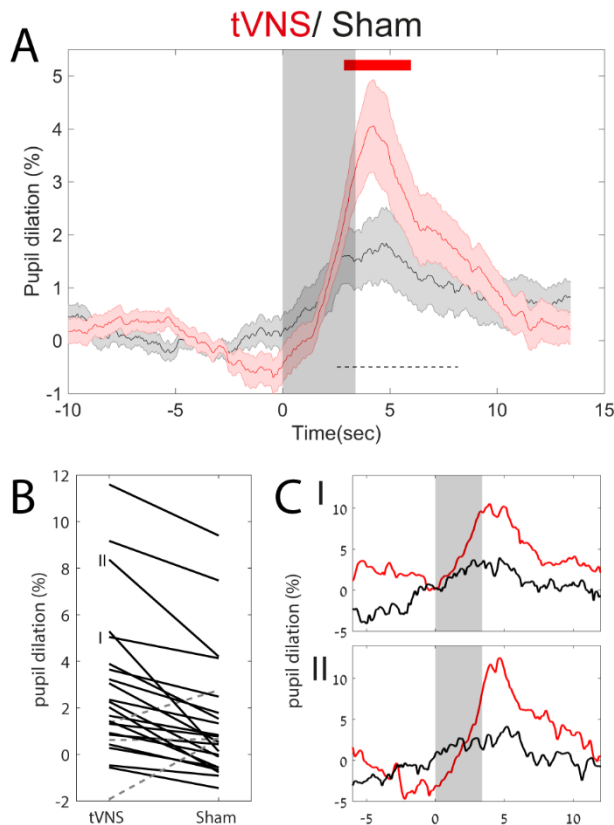

2

3 **Legend:** (A) grand average pupil dilation in response to tVNS (red trace) and sham stimulation  
4 (black trace), shaded areas around the trace indicate SEM, grey transparent rectangle indicate  
5 active current is on, upper red line indicate FDR corrected significance using Wilcoxon rank  
6 sum test, dashed black bar indicate time points to compute B. (B) single subject values in both  
7 tVNS and Sham condition between the 2 points of half maximum (FDHM, 3.2-10.4s dashed  
8 black bar in A). solid black lines indicate tVNS>Sham while dashed grey lines indicate the  
9 opposite – I,II refer to the single subject traces in C. (C) Single subjects examples as indicated  
10 in B, following the same presentation as in A.

11 **Transcutaneous vagus nerve stimulation attenuates alpha oscillations**

12 Alpha oscillations exhibit considerable inter-individual variability in frequency and scalp  
13 topography (Haegens et al., 2014). To facilitate a sensitive examination of how tVNS or sham  
14 stimulation affect alpha activity, we first identified the frequency and topography of alpha  
15 oscillations in each participant separately using parallel factor analysis (PARAFAC; Harshman,  
16 1970). PARAFAC provides a unique solution to decompose the EEG signal to three factors  
17 (time, frequency, channel; Figure 3) and may enhance sensitivity. It was previously applied to  
18 electrophysiological recordings (Miwakeichi et al., 2004; Yanagawa et al., 2013; Meij et al.,  
19 2016), and specifically for assessing individual alpha oscillations (Barzegaran et al., 2017;



1 Knyazeva et al., 2018); for a detailed review of its EEG applications, see Cong et al (2015). We  
2 identified the regions and frequencies of interest for alpha oscillations in each participant  
3 separately using unbiased “break” data between stimulation blocks. Figure 3C presents the  
4 result of this process in representative subjects, and Figure 4A shows the median region and  
5 frequency profile of alpha oscillations across all participants. PARAFAC successfully  
6 identified alpha activity (see examples in Figure 3C) capturing the subject's specific alpha  
7 frequency around 7-13Hz with the typical occipital topography.

### 8 **Figure 3: Parallel Factor Analysis (PARAFAC) to identify individual alpha activity**

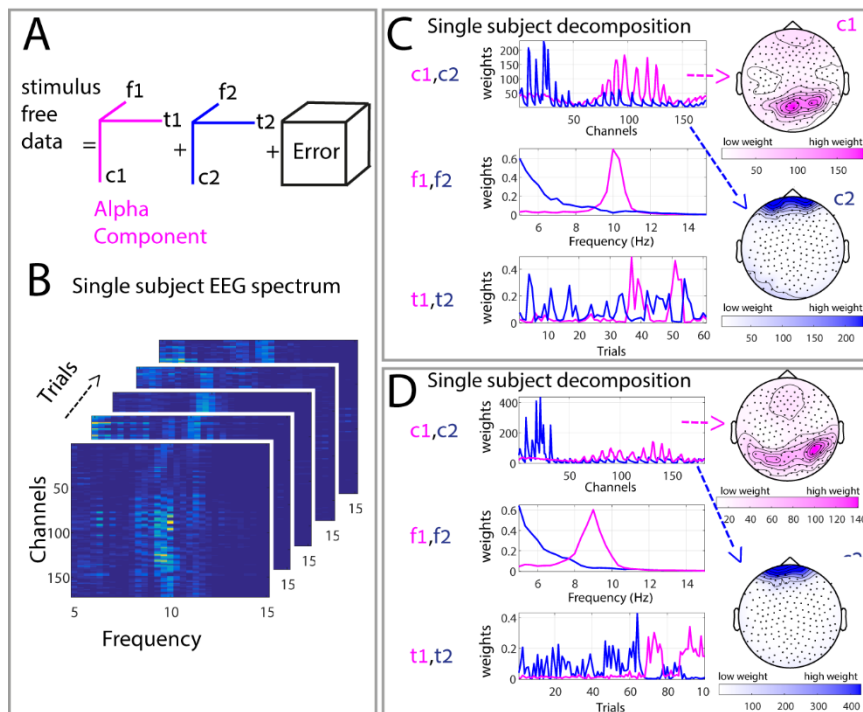

10 **Legend:** Graphic illustration of the parallel factor analysis method we used to decompose the  
11 stimulus free data (break) and create subject specific topographical and frequency bands of  
12 interest. (A) Illustration of the PARAFAC model with two components, where f1 and f2 refer  
13 to the frequency features, t1 and t2 indicate temporal features and c1 and c2 represent the spatial  
14 features of the components in the channel space. (B) Spectrogram of 5 single 3s "trials" derived  
15 from the break, same subject as top left in C (C) Examples of the decomposition result for 2  
16 different subjects. Each panel include both components 1 (red), 2 (blue) if present in the 3  
17 dimension (c) channel, (f) frequency and (t) trials. The spatial- channel dimension is also  
18 presented on the topographies on the right side.

19 After having identified alpha activity in each individual, we quantified the extent to which alpha  
20 activity may be decreased by tVNS or sham stimulation in each subject separately. We found  
21 that tVNS attenuated alpha activity (mean: 94.35±2.2% of baseline) to a greater extent than

1 sham stimulation that was not associated with significant alpha attenuation ( $103.55 \pm 2.4\%$  of  
2 baseline;  $p=0.0027$ , Wilcoxon signed rank test) relative to baseline (-1:0, n.s difference between  
3 conditions). Greater alpha attenuation following tVNS was evident in most (19/21) single  
4 subjects (Figure 4C). We correlated differences in alpha attenuation between the conditions in  
5 the single subject level and the differences in applied current, we found negative correlation  
6 ( $R=-0.49$ ,  $p=0.02$ ), that is subjects with much stronger sham showed less difference in alpha  
7 attenuation, but overall the current was actually stronger in sham ( $p=0.01$ ) in most individual  
8 subjects (18/21). Meaning that the alpha attenuation we observed constitute a lower bound  
9 while comparing the subjective report and allowing Sham current exceed tVNS current.

#### 10 **Figure 4: tVNS attenuates EEG alpha activity more than sham stimulation**

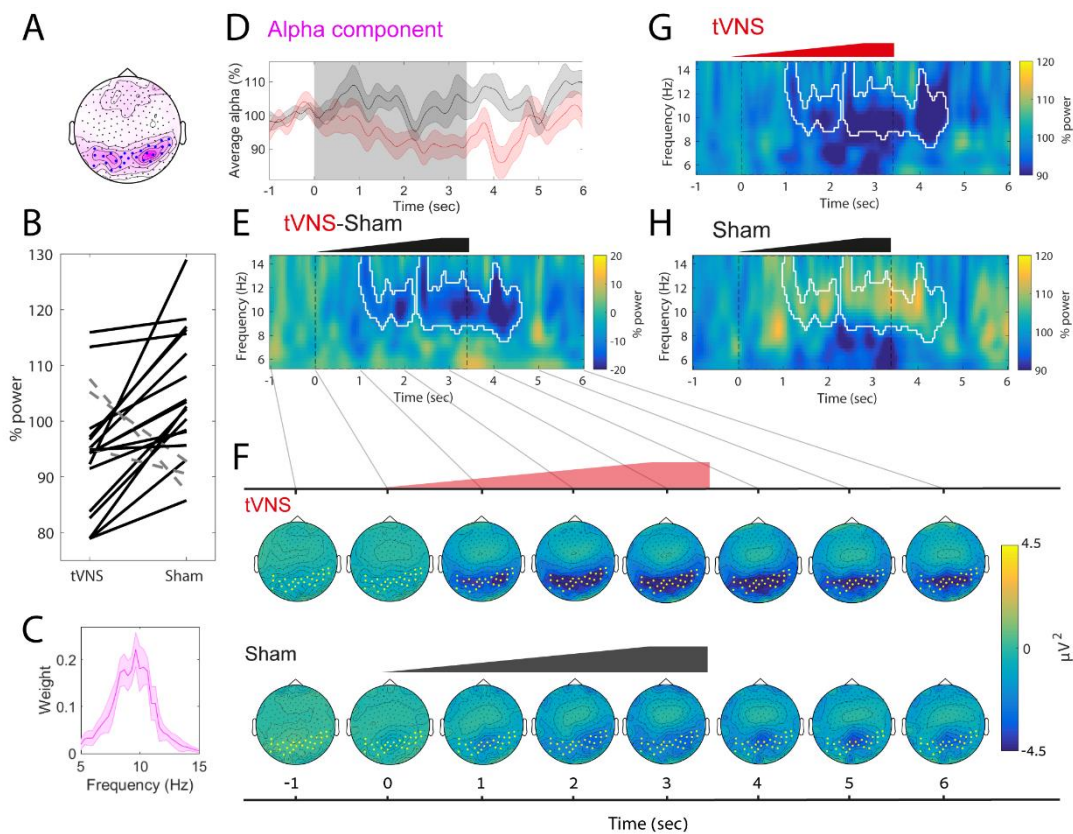

11

12 **Legend:** A) median alpha component topography. Blue points (selected using a threshold on  
13 the pink median weights) mark electrodes with strong alpha activity, in order to facilitate  
14 visualization in subsequent panel E but they are not used in statistical analyses. B) Alpha  
15 attenuation relative to baseline in single subjects data, using the weighted topography in A and  
16 spectral profile in C between 0:4sec. Black solid lines mark subjects showing alpha decrease  
17 whereas dashed gray lines mark subjects that do not show alpha decrease. (C) The median alpha  
18 component spectra profile (D) Average alpha component using both spectral profile depicted in C  
19 and topographical profile depicted in (E) Induced difference spectrogram between the

1 conditions tVNS-sham (G-H), white contours marks statistical significance of the cluster  
2 comparing the conditions using cluster correction for multiple comparisons. Note that tVNS  
3 causes attenuation of alpha oscillation for several seconds (F) Topographical dynamics  
4 following stimulation in the tVNS condition in 1s resolution reveals occipital alpha attenuation  
5 (upper panel while or sham stimulation does not reveal robust occipital alpha attenuation (lower  
6 panel) (G) Average induced spectrogram around tVNS, same white contour from E (H) Same  
7 figure for sham.

8 tVNS-induced alpha attenuation was not observed in our pilot experiment employing 30s ON /  
9 30s OFF ‘clinical-like’ stimulation ( $p > 0.05$ ,  $n=15$ ). In both experiments, we did not find  
10 significant correlation between alpha attenuation and subjective (or objective) individual scores  
11 of stimulation intensities, or significant correlation between alpha attenuation and pupil dilation  
12 at the single subject level (all  $p \geq 0.1$ ).

13 To complement the PARAFAC-based analysis and better understand the precise time-  
14 frequency dynamics and topographical changes of alpha attenuation, we used the weighted  
15 alpha topography from the break data as a ‘weighted region of interest’ to reduce the data to  
16 two dimensions (time and frequency). This approach ignored the frequency-of-interest and  
17 inspected the induced power changes in the 5-15Hz frequency range for the (weighted) occipital  
18 region derived from the PARAFAC decomposition (Figure 4A, lower panel). In line with the  
19 previous results, we found that tVNS significantly attenuated activity in the alpha band (8-  
20 12Hz, Figure 4B). Along this line, examining the effects of stimulation on EEG dynamics using  
21 cluster based permutation (Maris and Oostenveld, 2007) revealed a significant ( $p=0.0063$ , white  
22 contour in Figure 4B) cluster around 8-12Hz in the seconds following stimulation onset where  
23 mean alpha power was  $90.84 \pm 2.77\%$  in the tVNS condition, significantly lower than the  
24  $106.66 \pm 2.70\%$  observed following sham condition ( $p < 0.0001$  in a direct comparison). We  
25 also compared the two conditions using the classical alpha frequency range (8-12Hz), during  
26 stimulation (0-4s) (Means:  $94.41 \pm 2.15\%$  in tVNS condition and  $105.25 \pm 2.41\%$  in the sham  
27 condition,  $p=0.0012$  (both in signed rank test).

28 Finally, we tested to what extent the observed alpha attenuation was specific for occipital  
29 electrodes. We inspected the topographical changes in voltage around stimulation relative to  
30 baseline (Figure 4D). This analysis was carried out by focusing on the a-priori frequency-band

1 of interest derived from the PARAFAC decomposition (Figure 4A, upper panel) while ignoring  
2 the topography-of-interest derived from the break. This analysis revealed that alpha attenuation  
3 is specific to occipital areas. Importantly, the regions showing tVNS-induced alpha attenuation  
4 overlapped with electrodes showing alpha activity in the independent “break” intervals between  
5 stimulation blocks (compare blue dots in Figure 4A lower panel with yellow dots in Figure 4D).  
6 Altogether, the EEG data establish that short tVNS pulses, but not sham stimulation, attenuate  
7 individual occipital alpha activity.

## 1 **Discussion**

2 We examined the effects of short tVNS pulses (and sham stimulation at the ear lobe) on pupil  
3 dynamics and EEG alpha activity in naïve healthy subjects. While both objective and subjective  
4 stimulation intensities were not significantly different in the two conditions (Table 1), we found  
5 that short tVNS pulses induce pupil dilation (Figure 2) and EEG alpha attenuation (Figure 4) to  
6 a greater extent than sham stimulation. These effects support the hypothesis that tVNS activates  
7 endogenous neuromodulation (LC-NE/Basal Forebrain-Ach), as is known for invasive VNS  
8 (Hulsey et al., 2017; Mridha et al., 2019), and therefore suggest that tVNS mimics VNS.

9 **Validity and limitations.** Our results were obtained during fixation at rest. Although they may  
10 generalize well to other conditions, future studies need to determine the effects of short-pulse  
11 tVNS during other states such as specific cognitive tasks or during drowsiness and sleep. For  
12 example, high arousal at baseline could create a ceiling effect for pupil dilation (see Results)  
13 and alpha attenuation; conversely, during decreased vigilance the EEG effects may attenuate  
14 idle activity at different frequency bands (e.g. changing theta/alpha ratio during drowsiness, or  
15 suppressing slow wave activity in sleep). Another limitation is that we could only study tVNS  
16 in male volunteers. Since there may be sex-specific differences in LC-NE activity (Bangasser  
17 et al., 2016), future studies with females are warranted. Lastly, we chose to compare tVNS and  
18 sham condition by subjective level and not current – allowing sometimes one conditions current  
19 to be stronger. We saw that pupil dilation was not correlated to difference in current but  
20 difference in alpha attenuation was correlated. That is, alpha attenuation was somewhat driven  
21 by the difference in current, however, the current was stronger in the Sham condition and the  
22 almost all subjects – meaning this correlation was mainly driven by subjects with stronger sham  
23 current. Therefore these effect constitutes a lower bound.

24 **Previous tVNS studies.** Our finding that tVNS attenuates alpha oscillations is compatible with  
25 some recent studies (Bodin et al., 2015; Lewine et al., 2019) while other studies reported mixed  
26 results or could not reveal EEG effects (Hammond et al., 1992; Salinsky and Burchiel, 1993).  
27 Our use of short tVNS pulses likely contributed to our ability to reveal alpha attenuation, but it

1 should also be acknowledged that revealing alpha effects required sensitive analysis that used  
2 PARAFAC to identify alpha in each individual, and was observed in many, but not all subjects.  
3 Most other previous tVNS studies did not focus on ongoing EEG or pupillometry as done here,  
4 but tried to demonstrate the effectiveness of tVNS by focusing on the EEG P300 or on salivary  
5 alpha amylase as readouts. The P300 is a positive deflection with maximal amplitude over  
6 centro-parietal midline electrodes, 300-500ms after stimulus onset, whose amplitude is  
7 modulated by the probability of stimulus appearance regardless of sensory modality (Desmedt  
8 et al., 1965; Sutton et al., 1965). It is hypothesized that the P300 is a marker of LC-NE activity  
9 (Nieuwenhuis et al., 2005), because LC neurons are likewise activated by infrequent stimuli  
10 independent of sensory modality (Aston-Jones et al., 1991), and deviant stimuli elicit greater  
11 pupil dilation than standard stimuli (Murphy et al., 2011). However, the P300 may not  
12 constitute a straightforward test of tVNS efficacy since the link between P300 and LC-NE  
13 activity is still debated (Nieuwenhuis et al., 2011), and there could be significant contributions  
14 to P300 from dopaminergic (Glover et al., 1988) and glutamatergic (Hall et al., 2015) systems.  
15 Ventura-Bort et al (2018) demonstrated that tVNS amplifies the parietal component of the P300  
16 effect (P3b), selectively for easy targets in their task. However, this effect was modest and could  
17 not be replicated using weaker fixed currents (0.5mA) and simpler classical P300 task (Warren  
18 et al., 2018). Another study by Keute et al (2019) capitulated on the difference in pupil dilation  
19 between deviant and standard stimuli using a classical auditory oddball task. They used a  
20 constant 3mA tVNS in all subjects and found no effect of stimulation on event-related or  
21 baseline pupil diameter. One possibility is that 30s tVNS modulates tonic NE levels but does  
22 not affect phasic stimulus-evoked NE changes associated with the P300. In agreement with this  
23 possibility, using clonidine (an  $\alpha_2$  adrenergic receptor agonist that reduces NE signaling),  
24 provided similar mixed results (Pineda and Swick, 1992; Halliday et al., 1994; Pineda et al.,  
25 1997; Brown et al., 2015). Future studies could use short tVNS pulses as used here to better  
26 assess its effects on the P300.



1 Both Warren et al (Warren et al., 2018) and Ventura-Bort (2018) showed that tVNS increases  
2 levels of salivary alpha amylase, a peripheral measure of sympathetic activity associated with  
3 LC-NE signaling (Rohleder and Nater, 2009). However, this measure has poor temporal  
4 resolution and can only reveal differences between time intervals before vs. after stimulation  
5 blocks lasting many minutes. This approach does not leverage the superior temporal resolution  
6 of tVNS compared to pharmacological NE manipulations in humans, which are highly effective  
7 in studying the effects of slower NE dynamics (Gelbard-Sagiv et al., 2018). By contrast, the  
8 transient (within seconds) tVNS-mediated effects revealed here offer significant advantages  
9 over slow modulations brought about by NE drugs.

10 **Pupil dilation and alpha attenuation as indices of arousal and LC-NE activity.** The pupil  
11 was suggested as a proxy for noradrenergic signaling since Aston Jones and Cohen first  
12 provided an example of correlated dynamics in simultaneous pupil and LC single-unit activities  
13 in a monkey (Aston-Jones and Cohen, 2005; and see a recent review by Joshi and Gold, 2020)  
14 This relation was recently established in monkeys (Varazzani et al., 2015; Joshi et al., 2016),  
15 rats (Liu et al., 2017; Hayat et al., 2020), and mice (Reimer et al., 2016; Breton-Provencher and  
16 Sur, 2019), as well as in human BOLD fMRI (Murphy et al., 2014). The tVNS-induced pupil  
17 dilation time-course we observe (Figure 3) resembles the pupil dynamics in response to LC  
18 electrical stimulation in monkeys (Joshi et al., 2016) and optogenetic stimulation in rats (Hayat  
19 et al., 2020) supporting the hypothesis that tVNS activates the LC, as is established for invasive  
20 VNS.

21 Alpha oscillations are abundant during wakeful detachment from the sensory environment and  
22 considered an index of low arousal (Torsvall and Akerstedt, 1987b; Drapeau and Carrier,  
23 2004b). Alpha oscillations are believed to represent an “idling” state of cortical activity  
24 (Steriade, 2001; Palva and Palva, 2007) that is expected to be anti-correlated with arousal-  
25 promoting activity, such as that of the LC-NE system, and bias sensory perception (Waschke  
26 et al., 2019). A recent study that used long 2min tVNS on the neck also found that tVNS  
27 attenuates alpha and theta oscillation (Lewine et al., 2019).

1 **LC-NE vs. other neuromodulatory systems.** While pupil dilation and EEG alpha attenuation  
2 are both *compatible* with noradrenergic signaling, LC-NE involvement is unlikely to be the  
3 only modulatory system at play, given the overlap and redundancy among neuromodulatory  
4 systems. Other elements such as the cholinergic system also contribute to brain arousal and are  
5 associated with both pupil dilation (Reimer et al., 2016) and with EEG activation (Szerb, 1967).  
6 However, cholinergic activation alone is unlikely to drive the effects observed here since during  
7 Rapid Eye Movement (REM) sleep, when cholinergic activation occurs without LC-NE activity  
8 (Nir and Tononi, 2010), the EEG is activated but pupils remain constricted (Siegel, 2005).  
9 Moreover, given that VNS robustly activates the LC and no such relation has been reported for  
10 cholinergic nuclei, the most parsimonious interpretation is that the primary neuromodulatory  
11 effects of tVNS are noradrenergic, while cholinergic modulation (Mridha et al., 2019) are likely  
12 secondary. In addition, tVNS may engage additional subcortical neuromodulatory systems such  
13 as the dorsal raphe and ventral tegmental area, as observed with tVNS-induced BOLD fMRI  
14 (Frangos et al., 2015). Thus, the possible relation of tVNS to other neuromodulatory systems  
15 beyond LC-NE is an important topic for further investigation.

16 **tVNS as a novel tool for transient neuromodulation.** There is great interest in investigating  
17 the contribution of the LC-NE system to human cognition including perception, learning and  
18 memory, decision-making, and in aging and neurodegeneration. In this context, tVNS entails  
19 important advantages over existing tools. While important contributions have been made by  
20 relying on correlation with pupil dynamics (e.g de Gee et al., 2017), correlated LC-NE activity  
21 and pupil dynamics could still reflect hidden factors (such as fluctuations in arousal and  
22 attention) that constitute the causal root of the observed correlations (Clewett et al., 2018;  
23 Dragone et al., 2018) . Previous human studies also employed *causal* perturbations using NE  
24 drugs to study effects on perception (Gelbard-Sagiv et al., 2018), memory (see van Stegeren,  
25 2008 for review), and decision making (Warren et al., 2017) . However, systemic delivery of  
26 NE drugs is inherently limited to affecting tonic LC-NE activity and has poor temporal  
27 resolution, where tVNS has a clear added value.



1 Using invasive VNS in patients, previous studies reported effects on memory (Clark et al.,  
2 1999; Jacobs et al., 2015; for review see Hansen, 2017; Sun et al., 2017). However, such studies  
3 are only possible in patients suffering from severe epilepsy or depression. In addition, ongoing  
4 daily VNS induces complex long-term plastic changes that make interpretation difficult.

5 Due to limitations of existing techniques, the potential of tVNS has been recognized and it is  
6 being increasingly used to study cognition (Van Leusden et al., 2015). However, to date, the  
7 evidence supporting the notion that it is effective in mimicking invasive VNS was mixed. By  
8 using short stimulation pulses and maximal possible currents per participant, and by focusing  
9 on simple pupillary and ongoing EEG readouts, we show that such stimulation transiently elicits  
10 markers of brain arousal that are compatible with endogenous neuromodulation (NE/Ach)  
11 activity (supporting the hypothesis that it does mimic invasive VNS) thereby extending the  
12 experimental toolkit for non-pharmacological neuromodulation in humans with high temporal  
13 resolution. Therefore, it could be used to further investigate how transient neuromodulation  
14 contributes to human cognition. Finally, tVNS could be used to further understand the processes  
15 mediating the clinical improvements brought about by VNS in epilepsy and depression, for  
16 example the role of endogenous neuromodulation (NE/Ach) activity in improving mood in  
17 depressed patients (Grimonprez et al., 2015; Liu et al., 2016; Fang et al., 2017; Tu et al., 2018).  
18 In particular, tVNS-induced pupillary and EEG effects in individual patients could possibly  
19 predict the future clinical efficacy of invasive VNS and help guide triaging patients into either  
20 conservative therapy or surgical implantation of VNS stimulation devices.

21 **Software Accessibility** code is available upon request.

22 **Acknowledgements:** Supported by ISF 51/11 (I-CORE cognitive sciences) and the Adelis  
23 Foundation (YN), The Herczeg Institute on Aging, the TAU global research fund, and the  
24 Naomi Foundation (OS). The authors thank Nir lab members for discussions, Leon Deouell  
25 and Amit Marmelshtein for their comments on earlier drafts of the manuscript.

## 1 **References**

- 2 Amzica F, Lopes da Silva FH (2017) Niedermeyer's Electroencephalography (Schomer DL,  
3 Lopes da Silva FH, eds). Oxford University Press. Available at:  
4 [http://www.oxfordmedicine.com/view/10.1093/med/9780190228484.001.0001/med-](http://www.oxfordmedicine.com/view/10.1093/med/9780190228484.001.0001/med-9780190228484)  
5 [9780190228484](http://www.oxfordmedicine.com/view/10.1093/med/9780190228484.001.0001/med-9780190228484).
- 6 Andersson CA, Bro R (2000) The N -way Toolbox for MATLAB. :3–6.
- 7 Aston-Jones G, Chiang C, Alexinsky T (1991) Discharge of noradrenergic locus coeruleus  
8 neurons in behaving rats and monkeys suggests a role in vigilance. *Prog Brain Res*  
9 *88*:501–520 Available at: <http://www.ncbi.nlm.nih.gov/pubmed/1813931>.
- 10 Aston-Jones G, Cohen JD (2005) An integrative theory of locus coeruleus-norepinephrine  
11 function: adaptive gain and optimal performance. *Annu Rev Neurosci* *28*:403–450  
12 Available at: <http://www.ncbi.nlm.nih.gov/pubmed/16022602>.
- 13 Badran BW, Brown JC, Dowdle LT, Mithoefer OJ, LaBate NT, Coatsworth J, DeVries WH,  
14 Austelle CW, McTeague LM, Yu A, Bikson M, Jenkins DD, George MS (2018) Tragus  
15 or cymba conchae? Investigating the anatomical foundation of transcutaneous auricular  
16 vagus nerve stimulation (taVNS). *Brain Stimul* *11*:947–948 Available at:  
17 <https://doi.org/10.1016/j.brs.2018.06.003>.
- 18 Bangasser DA, Wiersielis KR, Khantsis S (2016) Sex differences in the locus coeruleus-  
19 norepinephrine system and its regulation by stress. *Brain Res* *1641*:177–188 Available  
20 at: <http://www.ncbi.nlm.nih.gov/pubmed/26607253>.
- 21 Barzegaran E, Vildavski VY, Knyazeva MG (2017) Fine Structure of Posterior Alpha  
22 Rhythm in Human EEG : Frequency Components , Their Cortical Sources , and  
23 Temporal Behavior. :1–12.
- 24 Bauer S, Baier H, Baumgartner C, Bohlmann K, Fauser S, Graf W, Hillenbrand B, Hirsch M,  
25 Last C, Lerche H, Mayer T, Schulze-Bonhage A, Steinhoff BJ, Weber Y, Hartlep A,  
26 Rosenow F, Hamer HM (2016) Transcutaneous Vagus Nerve Stimulation (tVNS) for

- 1 Treatment of Drug-Resistant Epilepsy: A Randomized, Double-Blind Clinical Trial  
2 (cMPsE02). *Brain Stimul* 9:356–363 Available at:  
3 <http://dx.doi.org/10.1016/j.brs.2015.11.003>.
- 4 Benjamini Y, Yekutieli D (2011) The Control of the False Discovery Rate in Multiple Testing  
5 under Dependency Source. *Statistics (Ber)* 29:1165–1188.
- 6 Bermejo P, López M, Larraya I, Chamorro J, Cobo JL, Ordóñez S, Vega JA (2017)  
7 Innervation of the Human Cavum Conchae and Auditory Canal : Anatomical Basis for  
8 Transcutaneous Auricular Nerve Stimulation. 2017.
- 9 Bodin C, Aubert S, Daquin G, Carron R, Scavarda D, McGonigal A, Bartolomei F (2015)  
10 Responders to vagus nerve stimulation (VNS) in refractory epilepsy have reduced  
11 interictal cortical synchronicity on scalp EEG. *Epilepsy Res* 113:98–103 Available at:  
12 <http://dx.doi.org/10.1016/j.eplepsyres.2015.03.018>.
- 13 Boon P, De Cock E, Mertens A, Trinka E (2018) Neurostimulation for drug-resistant  
14 epilepsy. *Curr Opin Neurol* 31:198–210 Available at:  
15 <http://insights.ovid.com/crossref?an=00019052-201804000-00015>.
- 16 Breton-Provencher V, Sur M (2019) Active control of arousal by a locus coeruleus  
17 GABAergic circuit. *Nat Neurosci* 22:218–228 Available at:  
18 <http://www.ncbi.nlm.nih.gov/pubmed/30643295>.
- 19 Bro R, Kiers HAL (2003) A new efficient method for determining the number of components  
20 in PARAFAC models. *J Chemom* 17:274–286 Available at:  
21 <http://doi.wiley.com/10.1002/cem.801>.
- 22 Brown SBRE, van der Wee NJA, van Noorden MS, Giltay EJ, Nieuwenhuis S (2015)  
23 Noradrenergic and cholinergic modulation of late ERP responses to deviant stimuli.  
24 *Psychophysiology* 52:1620–1631 Available at:  
25 <http://doi.wiley.com/10.1111/psyp.12544>.
- 26 Clark KB, Naritoku DK, Smith DC, Browning RA, Jensen RA (1999) Enhanced recognition

- 1 memory following vagus nerve stimulation in human subjects. *Nat Neurosci* 2:94–98  
2 Available at: <http://www.nature.com/doi/10.1038/4600>.
- 3 Clewett D V., Huang R, Velasco R, Lee T-H, Mather M (2018) Locus Coeruleus Activity  
4 Strengthens Prioritized Memories Under Arousal. *J Neurosci* 38:1558–1574 Available  
5 at: <http://www.jneurosci.org/lookup/doi/10.1523/JNEUROSCI.2097-17.2017>.
- 6 Cong F, Lin Q, Kuang L, Gong X, Astikainen P (2015) Tensor decomposition of EEG  
7 signals : A brief review. *J Neurosci Methods* 248:59–69 Available at:  
8 <http://dx.doi.org/10.1016/j.jneumeth.2015.03.018>.
- 9 de Gee JW, Colizoli O, Kloosterman NA, Knapen T, Nieuwenhuis S, Donner TH (2017)  
10 Dynamic modulation of decision biases by brainstem arousal systems. *Elife* 6 Available  
11 at: <http://www.ncbi.nlm.nih.gov/pubmed/28383284>.
- 12 de Gee JW, Knapen T, Donner TH (2014) Decision-related pupil dilation reflects upcoming  
13 choice and individual bias. *Proc Natl Acad Sci* 111:E618–E625 Available at:  
14 <http://www.pnas.org/lookup/doi/10.1073/pnas.1317557111>.
- 15 Desbeaumes Jodoin V, Lespérance P, Nguyen DK, Fournier-Gosselin M-PP, Richer F (2015)  
16 Effects of vagus nerve stimulation on pupillary function. *Int J Psychophysiol* 98:455–  
17 459 Available at: <http://dx.doi.org/10.1016/j.ijpsycho.2015.10.001>.
- 18 Desmedt JE, Debecker J, Manil J (1965) [Demonstration of a cerebral electric sign associated  
19 with the detection by the subject of a tactile sensorial stimulus. The analysis of cerebral  
20 evoked potentials derived from the scalp with the aid of numerical ordinates]. *Bull Acad  
21 R Med Belg* 5:887–936 Available at: <http://www.ncbi.nlm.nih.gov/pubmed/5864251>.
- 22 Dorr AE, Debonnel G (2006) Effect of Vagus Nerve Stimulation on Serotonergic and  
23 Noradrenergic Transmission. 318:890–898.
- 24 Dragone A, Lasaponara S, Pinto M, Rotondaro F, De Luca M, Doricchi F (2018) Expectancy  
25 modulates pupil size during endogenous orienting of spatial attention. *Cortex* 102:57–66  
26 Available at: <https://linkinghub.elsevier.com/retrieve/pii/S0010945217303179>.

- 1 Drapeau C, Carrier J (2004a) Fluctuation of waking electroencephalogram and subjective  
2 alertness during a 25-hour sleep-deprivation episode in young and middle-aged subjects.  
3 Sleep 27:55–60 Available at: <http://www.ncbi.nlm.nih.gov/pubmed/14998238>.
- 4 Drapeau C, Carrier J (2004b) Fluctuation of waking electroencephalogram and subjective  
5 alertness during a 25-hour sleep-deprivation episode in young and middle-aged subjects.  
6 Sleep 27:55–60.
- 7 Ellrich J (2011) Transcutaneous Vagus Nerve Stimulation. Eur Neurol Rev 6:254 Available  
8 at: <http://www.touchneurology.com/articles/transcutaneous-vagus-nerve-stimulation>.
- 9 Fang J, Egorova N, Rong P, Liu J, Hong Y, Fan Y, Wang X, Wang H, Yu Y, Ma Y, Xu C, Li  
10 S, Zhao J, Luo M, Zhu B, Kong J (2017) Early cortical biomarkers of longitudinal  
11 transcutaneous vagus nerve stimulation treatment success in depression. NeuroImage  
12 Clin 14:105–111 Available at: <http://dx.doi.org/10.1016/j.nicl.2016.12.016>.
- 13 Follesa P, Biggio F, Gorini G, Caria S, Talani G, Dazzi L, Puligheddu M, Marrosu F, Biggio  
14 G (2007) Vagus nerve stimulation increases norepinephrine concentration and the gene  
15 expression of BDNF and bFGF in the rat brain. 79.
- 16 Frangos E, Ellrich J, Komisaruk BR (2015) Non-invasive access to the vagus nerve central  
17 projections via electrical stimulation of the external ear: FMRI evidence in humans.  
18 Brain Stimul 8:624–636 Available at: <http://dx.doi.org/10.1016/j.brs.2014.11.018>.
- 19 Gelbard-Sagiv H, Magidov E, Sharon H, Hendler T, Nir Y (2018) Noradrenaline Modulates  
20 Visual Perception and Late Visually Evoked Activity. Curr Biol 28:2239-2249.e6  
21 Available at: <http://www.ncbi.nlm.nih.gov/pubmed/29983318>.
- 22 Glover A, Ghilardi MF, Bodis-Wollner I, Onofrj M (1988) Alterations in event-related  
23 potentials (ERPs) of MPTP-treated monkeys. Electroencephalogr Clin Neurophysiol  
24 Potentials Sect 71:461–468 Available at:  
25 <https://linkinghub.elsevier.com/retrieve/pii/0168559788900500>.
- 26 Grimonprez A et al. (2015) The antidepressant-like effect of vagus nerve stimulation is

- 1 mediated through the locus coeruleus. *J Psychiatr Res* 68:1–7 Available at:  
2 <http://dx.doi.org/10.1016/j.jpsychires.2015.05.002>.
- 3 Groves DA, Bowman EM, Brown VJ (2005) Recordings from the rat locus coeruleus during  
4 acute vagal nerve stimulation in the anaesthetised rat. *Neurosci Lett* 379:174–179.
- 5 Haegens S, Cousijn H, Wallis G, Harrison PJ, Nobre AC (2014) Inter- and intra-individual  
6 variability in alpha peak frequency. *Neuroimage* 92:46–55 Available at:  
7 <http://dx.doi.org/10.1016/j.neuroimage.2014.01.049>.
- 8 Hall M-H, Jensen JE, Du F, Smoller JW, O'Connor L, Spencer KM, Öngür D (2015) Frontal  
9 P3 event-related potential is related to brain glutamine/glutamate ratio measured in vivo.  
10 *Neuroimage* 111:186–191 Available at:  
11 <https://linkinghub.elsevier.com/retrieve/pii/S1053811915001159>.
- 12 Halliday R, Naylor H, Brandeis D, Callaway E, Yano L, Herzig K (1994) The effect of D-  
13 amphetamine, clonidine, and yohimbine on human information processing.  
14 *Psychophysiology* 31:331–337.
- 15 Hammond EJ, Uthman BM, Reid SA, Wilder BJ (1992) Electrophysiological Studies of  
16 Cervical Vagus Nerve Stimulation in Humans: I. EEG Effects. *Epilepsia* 33:1013–1020.
- 17 Hansen N (2017) The Longevity of Hippocampus-Dependent Memory Is Orchestrated by the  
18 Locus Coeruleus-Noradrenergic System. *Neural Plast* 2017.
- 19 Harshman RA (1970) Foundations of the PARAFAC procedure: Models and conditions for  
20 an "explanatory" multimodal factor analysis.
- 21 Hayat H, Regev N, Matosevich N, Sales A, Paredes-Rodriguez E, Krom AJ, Bergman L, Li  
22 Y, Lavigne M, Kremer EJ, Yizhar O, Pickering AE, Nir Y (2020) Locus coeruleus  
23 norepinephrine activity mediates sensory-evoked awakenings from sleep. *Sci Adv*  
24 6:eaaz4232 Available at: <http://www.ncbi.nlm.nih.gov/pubmed/32285002>.
- 25 He W, Jing X-H, Zhu B, Zhu X-L, Li L, Bai W-Z, Ben H (2013) The auriculo-vagal afferent

- 1 pathway and its role in seizure suppression in rats. *BMC Neurosci* 14:85 Available at:  
2 <http://bmcn neurosci.biomedcentral.com/articles/10.1186/1471-2202-14-85>.
- 3 Hein E, Nowak M, Kiess O, Biermann T, Bayerlein K, Kornhuber J, Kraus T (2013)  
4 Auricular transcutaneous electrical nerve stimulation in depressed patients: A  
5 randomized controlled pilot study. *J Neural Transm* 120:821–827.
- 6 Hulseley DR, Riley JR, Loerwald KW, Li RLR, Kilgard MP, Hays SA (2017) Parametric  
7 characterization of neural activity in the locus coeruleus in response to vagus nerve  
8 stimulation. *Exp Neurol* 289:21–30 Available at:  
9 <http://dx.doi.org/10.1016/j.expneurol.2016.12.005>.
- 10 Jacobs HIL, Riphagen JM, Razat CM, Wiese S, Sack AT (2015) Transcutaneous vagus nerve  
11 stimulation boosts associative memory in older individuals. *Neurobiol Aging* 36:1860–  
12 1867.
- 13 Joshi S, Gold JI (2020) Pupil Size as a Window on Neural Substrates of Cognition. *Trends*  
14 *Cogn Sci* 24:466–480 Available at:  
15 <https://linkinghub.elsevier.com/retrieve/pii/S1364661320300802>.
- 16 Joshi S, Li Y, Kalwani RM, Gold JI (2016) Relationships between Pupil Diameter and  
17 Neuronal Activity in the Locus Coeruleus, Colliculi, and Cingulate Cortex. *Neuron*  
18 89:221–234 Available at:  
19 <https://linkinghub.elsevier.com/retrieve/pii/S089662731501034X>.
- 20 Keute M, Demirezen M, Graf A, Mueller NG, Zaehle T (2019) No modulation of pupil size  
21 and event-related pupil response by transcutaneous auricular vagus nerve stimulation  
22 (taVNS). *Sci Rep* 9:11452 Available at: [http://www.nature.com/articles/s41598-019-](http://www.nature.com/articles/s41598-019-47961-4)  
23 47961-4.
- 24 Knyazeva MG, Barzegaran E, Vildavski VY, Demonet J (2018) Neurobiology of Aging of  
25 human alpha rhythm. *Neurobiol Aging* 69:261–273 Available at:  
26 <https://doi.org/10.1016/j.neurobiolaging.2018.05.018>.

- 1 Krahl SE, Clark KB (2012) Vagus nerve stimulation for epilepsy: A review of central  
2 mechanisms. *Surg Neurol Int* 3:S255-9 Available at:  
3 <http://www.ncbi.nlm.nih.gov/pubmed/23230530>.
- 4 Krahl SE, Clark KB, Smith DC, Browning RA (1998) Locus coeruleus lesions suppress the  
5 seizure-attenuating effects of vagus nerve stimulation. *Epilepsia* 39:709–714.
- 6 Kraus T, Hösl K, Kiess O, Schanze A, Kornhuber J, Forster C (2007) BOLD fMRI  
7 deactivation of limbic and temporal brain structures and mood enhancing effect by  
8 transcutaneous vagus nerve stimulation. *J Neural Transm* 114:1485–1493.
- 9 Kraus T, Kiess O, Hösl K, Terekhin P, Kornhuber J, Forster C (2013) CNS BOLD fMRI  
10 effects of sham-controlled transcutaneous electrical nerve stimulation in the left outer  
11 auditory canal - A pilot study. *Brain Stimul* 6:798–804 Available at:  
12 <http://dx.doi.org/10.1016/j.brs.2013.01.011>.
- 13 Kwon C-S, Ripa V, Al-Awar O, Panov F, Ghatan S, Jetté N (2018) Epilepsy and  
14 Neuromodulation—Randomized Controlled Trials. *Brain Sci* 8:69 Available at:  
15 <http://www.mdpi.com/2076-3425/8/4/69>.
- 16 Lewine JD, Paulson K, Bangera N, Simon BJ (2019) Exploration of the Impact of Brief  
17 Noninvasive Vagal Nerve Stimulation on EEG and Event-Related Potentials.  
18 *Neuromodulation Technol Neural Interface* 22:564–572 Available at:  
19 <https://onlinelibrary.wiley.com/doi/abs/10.1111/ner.12864>.
- 20 Liu J, Fang J, Wang Z, Rong P, Hong Y, Fan Y, Wang X, Park J, Jin Y, Liu C, Zhu B, Kong J  
21 (2016) Transcutaneous vagus nerve stimulation modulates amygdala functional  
22 connectivity in patients with depression. *J Affect Disord* 205:319–326 Available at:  
23 <http://dx.doi.org/10.1016/j.jad.2016.08.003>.
- 24 Liu Y, Rodenkirch C, Moskowitz N, Schriver B, Wang Q (2017) Dynamic Lateralization of  
25 Pupil Dilation Evoked by Locus Coeruleus Activation Results from Sympathetic, Not  
26 Parasympathetic, Contributions. *Cell Rep* 20:3099–3112 Available at:



- 1 <http://www.ncbi.nlm.nih.gov/pubmed/28954227>.
- 2 Manta S, Dong J, Debonnel G, Blier P (2009) Enhancement of the function of rat serotonin  
3 and norepinephrine neurons by sustained vagus nerve stimulation. *J Psychiatry Neurosci*  
4 34:272–280.
- 5 Manta S, Mansari M El, Debonnel G, Blier P (2013) Electrophysiological and neurochemical  
6 effects of long-term vagus nerve stimulation on the rat monoaminergic systems. :459–  
7 470.
- 8 Maris E, Oostenveld R (2007) Nonparametric statistical testing of EEG- and MEG-data. *J*  
9 *Neurosci Methods* 164:177–190.
- 10 Meij R Van Der, Ede F Van, Maris E (2016) Rhythmic Components in Extracranial Brain  
11 Signals Reveal Multifaceted Task Modulation of Overlapping Neuronal Activity. :1–28.
- 12 Miwakeichi F, Martínez-Montes E, Valdés-Sosa PA, Nishiyama N, Mizuhara H, Yamaguchi  
13 Y (2004) Decomposing EEG data into space-time-frequency components using Parallel  
14 Factor Analysis. *Neuroimage* 22:1035–1045 Available at:  
15 <http://www.ncbi.nlm.nih.gov/pubmed/15219576>.
- 16 Mridha Z, Gee JW de, Shi Y, Alkashgari R, Williams J, Suminski A, Ward MP, Zhang W,  
17 McGinley MJ (2019) Graded recruitment of pupil-linked neuromodulation by  
18 parametric stimulation of the vagus nerve. *bioRxiv:2019.12.28.890111* Available at:  
19 <http://biorxiv.org/content/early/2019/12/30/2019.12.28.890111.abstract>.
- 20 Murphy PR, O’Connell RG, O’Sullivan M, Robertson IH, Balsters JH (2014) Pupil diameter  
21 covaries with BOLD activity in human locus coeruleus. *Hum Brain Mapp* 35:4140–  
22 4154 Available at: <http://www.ncbi.nlm.nih.gov/pubmed/24510607>.
- 23 Murphy PR, Robertson IH, Balsters JH, O’connell RG (2011) Pupillometry and P3 index the  
24 locus coeruleus-noradrenergic arousal function in humans. *Psychophysiology* 48:1532–  
25 1543.

- 1 Nemeroff CB, Mayberg HS, Krahl SE, McNamara J, Frazer A, Henry TR, George MS,  
2 Charney DS, Brannan SK (2006) VNS therapy in treatment-resistant depression: clinical  
3 evidence and putative neurobiological mechanisms. *Neuropsychopharmacology*  
4 31:1345–1355 Available at: <http://www.ncbi.nlm.nih.gov/pubmed/16641939>.
- 5 Nieuwenhuis S, Aston-Jones G, Cohen JD (2005) Decision making, the P3, and the locus  
6 coeruleus-norepinephrine system. *Psychol Bull* 131:510–532 Available at:  
7 <http://doi.apa.org/getdoi.cfm?doi=10.1037/0033-2909.131.4.510>.
- 8 Nieuwenhuis S, De Geus EJ, Aston-Jones G (2011) The anatomical and functional  
9 relationship between the P3 and autonomic components of the orienting response.  
10 *Psychophysiology* 48:162–175 Available at:  
11 <http://www.ncbi.nlm.nih.gov/pubmed/20557480>.
- 12 Nir Y, Tononi G (2010) Dreaming and the brain: from phenomenology to neurophysiology.  
13 *Trends Cogn Sci* 14:88–100 Available at:  
14 [http://www.pubmedcentral.nih.gov/articlerender.fcgi?artid=2814941&tool=pmcentrez&](http://www.pubmedcentral.nih.gov/articlerender.fcgi?artid=2814941&tool=pmcentrez&rendertype=abstract)  
15 [rendertype=abstract](http://www.pubmedcentral.nih.gov/articlerender.fcgi?artid=2814941&tool=pmcentrez&rendertype=abstract) [Accessed May 28, 2014].
- 16 Oostenveld R, Fries P, Maris E, Schoffelen J-M (2011) FieldTrip: Open Source Software for  
17 Advanced Analysis of MEG, EEG, and Invasive Electrophysiological Data. *Comput*  
18 *Intell Neurosci* 2011:1–9.
- 19 Palva S, Palva JM (2007) New vistas for  $\alpha$ -frequency band oscillations. *Trends Neurosci*  
20 30:150–158.
- 21 Peirce JW (2007) PsychoPy--Psychophysics software in Python. *J Neurosci Methods* 162:8–  
22 13 Available at: <http://www.ncbi.nlm.nih.gov/pubmed/17254636>.
- 23 Peuker ET, Filler TJ (2002) The nerve supply of the human auricle. *Clin Anat* 15:35–37.
- 24 Pineda JA, Swick D (1992) Visual P3-like potentials in squirrel monkey: Effects of a  
25 noradrenergic agonist. *Brain Res Bull* 28:485–491 Available at:  
26 <https://linkinghub.elsevier.com/retrieve/pii/036192309290051X>.

- 1 Pineda JA, Westerfield M, Kronenberg BM, Kubrin J (1997) Human and monkey P3-like  
2 responses in a mixed modality paradigm: effects of context and context-dependent  
3 noradrenergic influences. *Int J Psychophysiol* 27:223–240 Available at:  
4 <https://linkinghub.elsevier.com/retrieve/pii/S0167876097000615>.
- 5 Raedt R, Clinckers R, Mollet L, Vonck K, El Tahry R, Wyckhuys T, De Herdt V, Carrette E,  
6 Wadman W, Michotte Y, Smolders I, Boon P, Meurs A (2011) Increased hippocampal  
7 noradrenaline is a biomarker for efficacy of vagus nerve stimulation in a limbic seizure  
8 model. *J Neurochem* 117:461–469 Available at: [http://doi.wiley.com/10.1111/j.1471-](http://doi.wiley.com/10.1111/j.1471-4159.2011.07214.x)  
9 [4159.2011.07214.x](http://doi.wiley.com/10.1111/j.1471-4159.2011.07214.x).
- 10 Redgrave J, Day D, Leung H, Laud PJ, Ali A, Lindert R, Majid A (2018) Safety and  
11 tolerability of Transcutaneous Vagus Nerve stimulation in humans; a systematic review.  
12 *Brain Stimul* 11:1225–1238 Available at: <https://doi.org/10.1016/j.brs.2018.08.010>.
- 13 Reimer J, McGinley MJ, Liu Y, Rodenkirch C, Wang Q, McCormick DA, Tolia AS (2016)  
14 Pupil fluctuations track rapid changes in adrenergic and cholinergic activity in cortex.  
15 *Nat Commun* 7:13289 Available at: <http://www.nature.com/articles/ncomms13289>.
- 16 Rohleder N, Nater UM (2009) Determinants of salivary alpha-amylase in humans and  
17 methodological considerations. *Psychoneuroendocrinology* 34:469–485 Available at:  
18 <http://www.ncbi.nlm.nih.gov/pubmed/19155141>.
- 19 Rong P, Liu J, Wang L, Liu R, Fang J, Zhao J, Zhao Y, Wang H, Vangel M, Sun S, Ben H,  
20 Park J, Li S, Meng H, Zhu B, Kong J (2016) Effect of transcutaneous auricular vagus  
21 nerve stimulation on major depressive disorder: A nonrandomized controlled pilot study.  
22 *J Affect Disord* 195:172–179 Available at: <http://dx.doi.org/10.1016/j.jad.2016.02.031>.
- 23 Roosevelt RW, Smith DC, Clough RW, Jensen RA, Browning RA (2006) Increased  
24 extracellular concentrations of norepinephrine in cortex and hippocampus following  
25 vagus nerve stimulation in the rat. *Brain Res* 1119:124–132.
- 26 Safi S, Ellrich J, Neuhuber W (2016) Myelinated Axons in the Auricular Branch of the

- 1 Human Vagus Nerve. *Anat Rec* 299:1184–1191.
- 2 Salinsky MC, Burchiel KJ (1993) Vagus Nerve Stimulation Has No Effect on Awake EEG  
3 Rhythms in Humans. *Epilepsia* 34:299–304.
- 4 Sellaro R, van Leusden JWR, Tona K-D, Verkuil B, Nieuwenhuis S, Colzato LS (2015)  
5 Transcutaneous Vagus Nerve Stimulation Enhances Post-error Slowing. *J Cogn*  
6 *Neurosci* 27:2126–2132 Available at:  
7 [http://www.mitpressjournals.org/doi/10.1162/jocn\\_a\\_00851](http://www.mitpressjournals.org/doi/10.1162/jocn_a_00851).
- 8 Siegel JM (2005) Chapter 10 - REM Sleep. In: *Principles and Practice of Sleep Medicine*  
9 (Fourth Edition), Fourth Edi. (Kryger MH, Roth T, Dement WC, eds), pp 120–135.  
10 Philadelphia: W.B. Saunders. Available at:  
11 <http://www.sciencedirect.com/science/article/pii/B0721607977500173>.
- 12 Steenbergen L, Sellaro R, Stock AK, Verkuil B, Beste C, Colzato LS (2015) Transcutaneous  
13 vagus nerve stimulation (tVNS) enhances response selection during action cascading  
14 processes. *Eur Neuropsychopharmacol* 25:773–778 Available at:  
15 <http://dx.doi.org/10.1016/j.euroneuro.2015.03.015>.
- 16 Stefan H, Kreiselmeyer G, Kerling F, Kurzbuch K, Rauch C, Heers M, Kasper BS, Hammen  
17 T, Rzonsa M, Pauli E, Ellrich J, Graf W, Hopfengärtner R (2012) Transcutaneous vagus  
18 nerve stimulation (t-VNS) in pharmaco-resistant epilepsies: a proof of concept trial.  
19 *Epilepsia* 53:e115-8 Available at: <http://www.ncbi.nlm.nih.gov/pubmed/22554199>.
- 20 Steriade M (2001) Impact of network activities on neuronal properties in corticothalamic  
21 systems. *J Neurophysiol* 86:1–39 Available at:  
22 <http://www.ncbi.nlm.nih.gov/pubmed/11431485>.
- 23 Sun L, Peräkylä J, Holm K, Haapasalo J, Lehtimäki K, Ogawa KH, Peltola J, Hartikainen KM  
24 (2017) Vagus nerve stimulation improves working memory performance. *J Clin Exp*  
25 *Neuropsychol* 00:1–11 Available at:  
26 <https://www.tandfonline.com/doi/full/10.1080/13803395.2017.1285869>.

- 1 Sutton S, Braren M, Zubin J, John ER (1965) Evoked-potential correlates of stimulus  
2 uncertainty. *Science* 150:1187–1188 Available at:  
3 <http://www.ncbi.nlm.nih.gov/pubmed/5852977>.
- 4 Szerb JC (1967) Cortical acetylcholine release and electroencephalographic arousal. *J Physiol*  
5 192:329–343 Available at: <http://www.ncbi.nlm.nih.gov/pubmed/6050151>.
- 6 Takigawa M, Mogenson GJ (1977) A study of inputs to antidromically identified neurons of  
7 the locus coeruleus. *Brain Res* 135:217–230 Available at:  
8 <http://www.ncbi.nlm.nih.gov/pubmed/922473>.
- 9 Torsvall L, Akerstedt T (1987a) Sleepiness on the job: continuously measured EEG changes  
10 in train drivers. *Electroencephalogr Clin Neurophysiol* 66:502–511 Available at:  
11 <http://www.ncbi.nlm.nih.gov/pubmed/2438115>.
- 12 Torsvall L, Akerstedt T (1987b) Sleepiness on the job: continuously measured EEG changes  
13 in train drivers. *Electroencephalogr Clin Neurophysiol* 66:502–511.
- 14 Trevizol AP, Shiozawa P, Tairar I, Soares A, Gomes JS, Barros MD, Liquidato BM, Cordeiro  
15 Q (2016) Transcutaneous Vagus Nerve Stimulation (taVNS) for Major Depressive  
16 Disorder: An Open Label Proof-of-Concept Trial. *Brain Stimul* 9:453–454 Available at:  
17 <http://dx.doi.org/10.1016/j.brs.2016.02.001>.
- 18 Tu Y, Fang J, Cao J, Wang Z, Park J, Jorgenson K, Lang C, Liu J, Zhang G, Zhao Y, Zhu B,  
19 Rong P, Kong J (2018) A distinct biomarker of continuous transcutaneous vagus nerve  
20 stimulation treatment in major depressive disorder. *Brain Stimul* 11:501–508 Available  
21 at: <https://doi.org/10.1016/j.brs.2018.01.006>.
- 22 Van Bockstaele EJ, Peoples J, Telegan P (1999) Efferent projections of the nucleus of the  
23 solitary tract to peri-Locus coeruleus dendrites in rat brain: Evidence for a monosynaptic  
24 pathway. *J Comp Neurol* 412:410–428.
- 25 Van Leusden JWR, Sellaro R, Colzato LS (2015) Transcutaneous Vagal Nerve Stimulation  
26 (tVNS): A new neuromodulation tool in healthy humans? *Front Psychol* 6:2013–2016.

- 1 van Steenbergen H, Band GPH (2013) Pupil dilation in the Simon task as a marker of conflict  
2 processing. *Front Hum Neurosci* 7 Available at:  
3 <http://journal.frontiersin.org/article/10.3389/fnhum.2013.00215/abstract>.
- 4 van Stegeren AH (2008) The role of the noradrenergic system in emotional memory. *Acta*  
5 *Psychol (Amst)* 127:532–541 Available at:  
6 <https://linkinghub.elsevier.com/retrieve/pii/S0001691807001278>.
- 7 Varazzani C, San-Galli A, Gilardeau S, Bouret S (2015) Noradrenaline and dopamine neurons  
8 in the reward/effort trade-off: a direct electrophysiological comparison in behaving  
9 monkeys. *J Neurosci* 35:7866–7877 Available at:  
10 <http://www.ncbi.nlm.nih.gov/pubmed/25995472>.
- 11 Ventura-Bort C, Wirkner J, Genheimer H, Wendt J, Hamm AO, Weymar M (2018) Effects of  
12 Transcutaneous Vagus Nerve Stimulation (tVNS) on the P300 and Alpha-Amylase  
13 Level: A Pilot Study. *Front Hum Neurosci* 12:202 Available at:  
14 <http://www.ncbi.nlm.nih.gov/pubmed/29977196>.
- 15 Vonck K, Raedt R, Naulaerts J, De Vogelaere F, Thiery E, Van Roost D, Aldenkamp B,  
16 Miatton M, Boon P (2014) Vagus nerve stimulation. . .25 years later! What do we know  
17 about the effects on cognition? *Neurosci Biobehav Rev* 45:63–71 Available at:  
18 <http://dx.doi.org/10.1016/j.neubiorev.2014.05.005>.
- 19 Warren CM, Tona KD, Ouwkerk L, van Paridon J, Poletiek F, van Steenbergen H, Bosch  
20 JA, Nieuwenhuis S (2018) The neuromodulatory and hormonal effects of transcutaneous  
21 vagus nerve stimulation as evidenced by salivary alpha amylase, salivary cortisol, pupil  
22 diameter, and the P3 event-related potential. *Brain Stimul* 12:1–8 Available at:  
23 <https://doi.org/10.1016/j.brs.2018.12.224>.
- 24 Warren CM, Wilson RC, van der Wee NJ, Giltay EJ, van Noorden MS, Cohen JD,  
25 Nieuwenhuis S (2017) The effect of atomoxetine on random and directed exploration in  
26 humans. *PLoS One* 12:e0176034 Available at:

- 1 <http://www.ncbi.nlm.nih.gov/pubmed/28445519>.
- 2 Waschke L, Tune S, Obleser J (2019) Local cortical desynchronization and pupil-linked  
3 arousal differentially shape brain states for optimal sensory performance. *Elife* 8  
4 Available at: <http://www.ncbi.nlm.nih.gov/pubmed/31820732>.
- 5 Wilcoxon F (1945) Individual Comparisons by Ranking Methods. *Biometrics Bull* 1:80  
6 Available at: <https://www.jstor.org/stable/10.2307/3001968?origin=crossref>.
- 7 Yakunina N, Kim SS, Nam E-C (2017) Optimization of Transcutaneous Vagus Nerve  
8 Stimulation Using Functional MRI. *Neuromodulation* 20:290–300 Available at:  
9 <http://www.ncbi.nlm.nih.gov/pubmed/27898202>.
- 10 Yanagawa T, Chao ZC, Hasegawa N, Fujii N (2013) Large-scale information flow in  
11 conscious and unconscious states: An ECoG study in monkeys. *PLoS One* 8:1–13.  
12
